# Supplementary material for: Mediterranean diet for cardiovascular disease: an evidence mapping study
Source: PubMed Central journal article supplement (PMC11075113; doi:10.1017/s1368980024000776), 2024-04-11
Supplement: S1368980024000776sup001.pdf [file S1368980024000776sup001.pdf]

## *Supplementary Material*

**Table S1.** Search Strategy

(1) PubMed

| <b>Search</b> | <b>Query</b>                                                         | <b>Items</b> |
|---------------|----------------------------------------------------------------------|--------------|
| #1            | "Diet, Mediterranean"[Mesh]                                          | 5071         |
| #2            | (Diet, Mediterranean[Title/Abstract]) OR Mediterranean*              | 60305        |
| #3            | #1 OR #2                                                             | 60305        |
| #4            | "Meta-Analysis" [Publication Type] OR "Meta-Analysis as Topic"[Mesh] | 198744       |
| #5            | (Meta analys*[Title/Abstract]) OR Systematic review*[Title/Abstract] | 402802       |
| #6            | # 4 OR #5                                                            | 430373       |
| #7            | #3 AND #6                                                            | 1316         |

(2) Embase

| <b>Search</b> | <b>Query</b>                                        | <b>Items</b> |
|---------------|-----------------------------------------------------|--------------|
| #1            | 'Diet, Mediterranean'/exp                           | 11592        |
| #2            | 'Diet, Mediterranean':ab,ti OR Mediterranean*:ab,ti | 53881        |
| #3            | #1 OR #2                                            | 56984        |
| #4            | 'meta analysis'/exp                                 | 272348       |
| #5            | 'meta analys*':ab,ti OR 'systematic review*':ab,ti  | 496212       |
| #6            | #4 OR #5                                            | 541286       |
| #7            | #3 AND #6                                           | 1489         |

(3) Cochrane Library

| <b>Search</b> | <b>Query</b>                                                | <b>Items</b> |
|---------------|-------------------------------------------------------------|--------------|
| #1            | MeSH descriptor: [Diet, Mediterranean] explode all trees    | 754          |
| #2            | (Diet, Mediterranean):ti,ab,kw OR (Mediterranean*):ti,ab,kw | 2733         |
| #3            | #1 OR #2                                                    | 2733         |
| #4            | MeSH descriptor: [Meta-Analysis as Topic] explode all trees | 1439         |
| #5            | (Meta analys*):ti,ab,kw OR (Systematic review*):ti,ab,kw    | 27376        |
| #6            | #4 OR #5                                                    | 27376        |
| #7            | #3 AND #6                                                   | 60           |

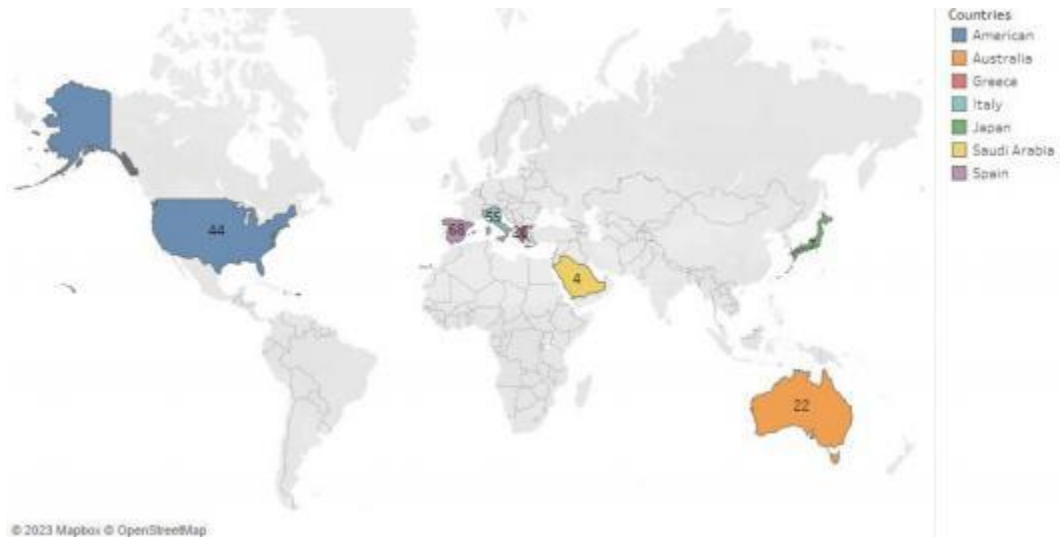

**Figure S1.** Distribution of publications by country.

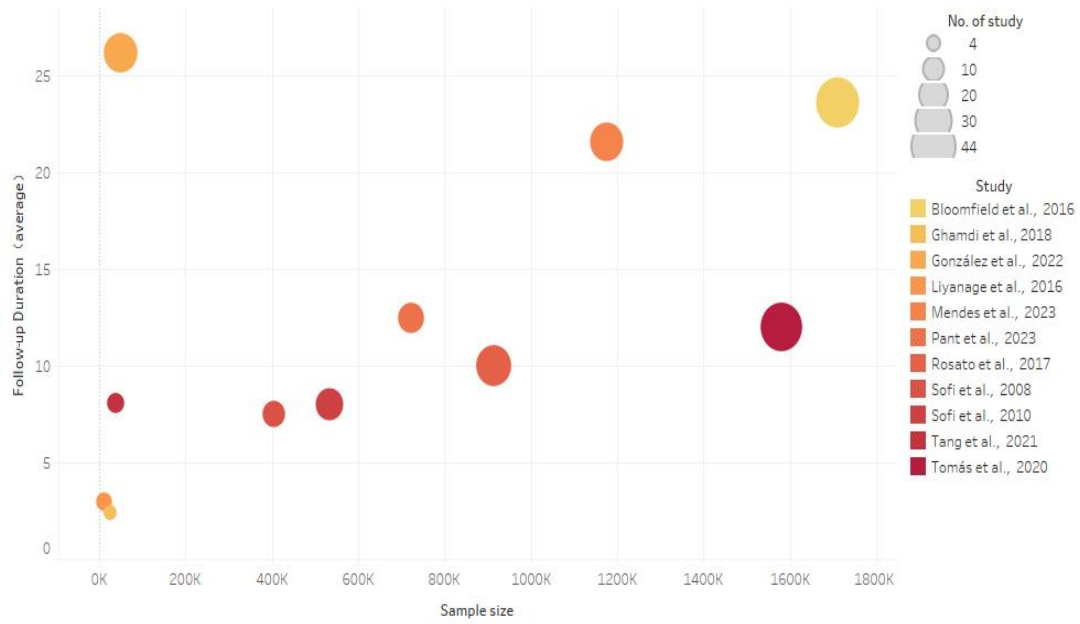

**Figure S2.** Evidence mapping of MD for cardiovascular disease. Including study, the number of included studies, sample size and follow-up time.
